# Supplementary material for: From face to interface recognition: a differential geometric approach to distinguish DNA from RNA binding surfaces
Source: PubMed Central journal article supplement — Nucleic Acids Res. 2011 Jun 21;39(17):7390–9. doi: 10.1093/nar/gkr395 (PMC3177183; doi:10.1093/nar/gkr395), 2011-06-21
Supplement: supp_gkr395_supp_figures_tables.pdf [file supp_gkr395_supp_figures_tables.pdf]

## Supplementary Figures

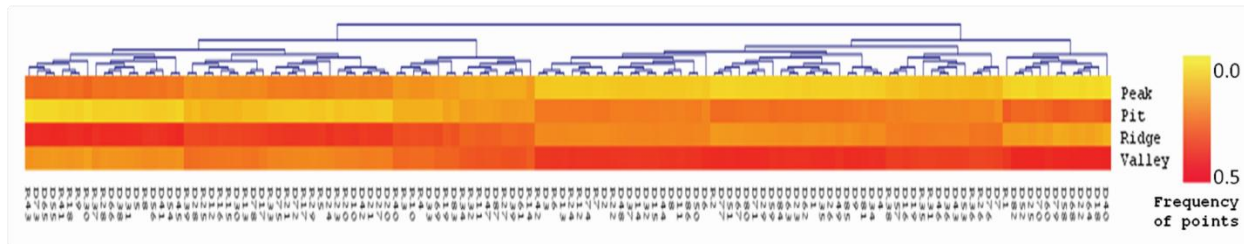

**Figure S1 Hierarchical clustering of the redundant set of dsDNA and ssRNA interfaces**

Hierarchical clustering of the interface vectors extracted from the “NAbind-130” dataset. Interfaces are labeled according to the NA-binding protein label (see supplementary data file S1), R and D, denote RNA-binding and DNA-binding interfaces, respectively. Vectors represent the frequency of the binding interface points related to the local geometric shapes Peak, Pit, Ridge and Valley. High frequency is colored red and low frequency colored yellow. Color bar is shown.

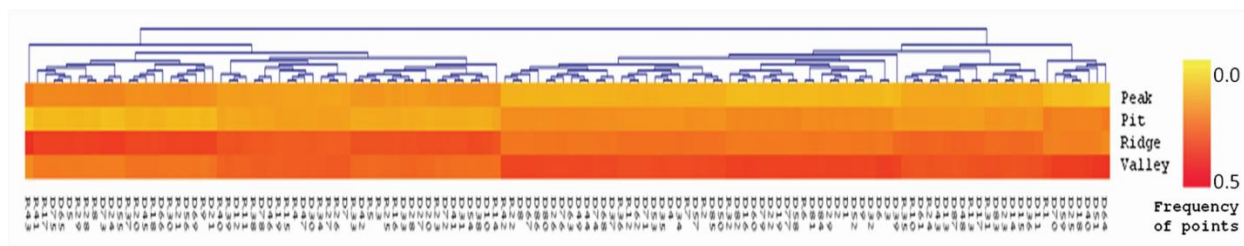

**Figure S2 Hierarchical clustering of the dsDNA and ssRNA electrostatic patches**

Hierarchical clustering of the vectors representing the largest positive patches, extracted from the “NAbind-77nr” dataset. Interfaces are labeled according to the NA-binding protein label (see supplementary data file S1), R and D, denote RNA-binding and DNA-binding interfaces, respectively. Vectors represent the frequency of the patch points related to the local geometric shapes Peak, Pit, Ridge and Valley. High frequency is colored red and low frequency colored yellow. Color bar is shown.

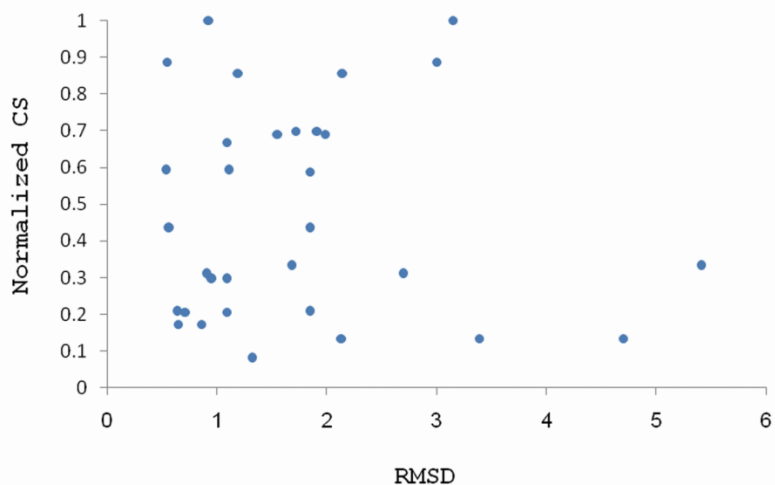

**Figure S3: Correlation between the RMSD and Normalized Correlation Score.** RMSD was calculated between the pairs of bound and unbound proteins. Correlation Score (CS) was calculated between the DG vectors of the bound and unbound interfaces. As shown no correlation was found between the RMSD and the normalized CS (Pearson correlation = -0.037)

## Supplementary Tables

**Table S1:** The fundamental surface shapes

|         | $K > 0$                                                                                | $K < 0$                                                                                              | $K = 0$                                                                                    |
|---------|----------------------------------------------------------------------------------------|------------------------------------------------------------------------------------------------------|--------------------------------------------------------------------------------------------|
| $H > 0$ | 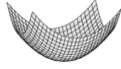 Pit  |  Saddle<br>Valley   |  Ridge  |
| $H < 0$ |  Peak |  Saddle<br>Ridge    |  Valley |
| $H = 0$ | Other                                                                                  |  Minimal<br>Surface |  Flat   |

**Table S2: Summary of results**

|                                | Training * | Testing * | False DNA | False RNA | True DNA | True RNA | Training Accuracy | Sensitivity | Specificity | MCC <sup>s</sup> | Testing accuracy |
|--------------------------------|------------|-----------|-----------|-----------|----------|----------|-------------------|-------------|-------------|------------------|------------------|
| <b>Unsupervised Clustering</b> |            |           |           |           |          |          |                   |             |             |                  |                  |
| <b>NAbind-130</b>              | I          | I         | 31        | 13        | 56       | 30       | 66                | 81          | 49          | 0.33             |                  |
| <b>NAbind-77nr</b>             | I          | I         | 11        | 6         | 41       | 19       | 78                | 87          | 63          | 0.53             |                  |
| <b>NAbind-130</b>              | P          | P         | 28        | 14        | 59       | 29       | 67                | 80          | 50          | 0.33             |                  |
| <b>Decision Tree</b>           |            |           |           |           |          |          |                   |             |             |                  |                  |
| <b>NAbind-130</b>              | I          | I         | 23        | 6         | 64       | 37       | 78                | 91          | 62          | 0.57             |                  |
| <b>NAbind-77nr</b>             | I          | I         | 11        | 4         | 41       | 21       | 81                | 91          | 66          | 0.6              |                  |
| <b>NAbind-130</b>              | P          | I         | 9         | 19        | 78       | 24       | 79                | 80          | 73          | 0.49             |                  |
| <b>SVM **</b>                  |            |           |           |           |          |          |                   |             |             |                  |                  |
| <b>NAbind-130 E</b>            | I          | I         | 14        | 36        | 51       | 29       | 62                | 59          | 67          | 0.24             | 0.63             |
| <b>NAbind-77nr E</b>           | I          | I         | 10        | 19        | 33       | 15       | 62                | 64          | 60          | 0.22             | 0.62             |
| <b>NAbind-130 EG</b>           | I          | I         | 12        | 24        | 63       | 31       | 72                | 72          | 72          | 0.42             | 0.78             |
| <b>NAbind-77nr EG</b>          | I          | I         | 4         | 9         | 43       | 21       | 83                | 83          | 83          | 0.64             | 0.82             |

<sup>s</sup> MCC was calculated as described in Material and Methods

\* I=real interface, P=predicted patch

\*\*All SVM test were performed using hold-one-out cross validation , E =SVM was trained on electrostatic features only, EG=SVM was trained on Electrostatic+Geometric features

**Table S3:** Statistical analysis of individual parameters selected for the SVM

| Feature                                                 | T-test * | F-test* | Mann whitney test* |
|---------------------------------------------------------|----------|---------|--------------------|
| Frequency of interface points belong to the Peak        | 4.7e-7   | 5.8e-1  | 4.9 e-6            |
| Frequency of interface points belong to the Pit         | 9.8e-6   | 7.8e-1  | 3.1e-5             |
| Frequency of interface points belong to the Ridge       | 5.6e-6   | 9.9e-1  | 2.6e-5             |
| Frequency of interface points belong to the Valley      | 7.6e-7   | 8.8e-1  | 1.9e-6             |
| Number of atoms in the third patch <sup>§</sup>         | 8.3e-4   | 2.9e-4  | 4.5e-3             |
| Number of atoms in the negative patch <sup>§</sup>      | 5.3e-3   | 4.0e-7  | 2.0e-2             |
| Molecular weights per residue <sup>§</sup>              | 2.1e-2   | 6.5e-1  | 4.6e-2             |
| Frequency of alpha helix in positive patch <sup>§</sup> | 8.1e-2   | 3.3e-1  | 8.7e-2             |
| Frequency of beta sheet in positive patch <sup>§</sup>  | 2.2e-1   | 8.9e-1  | 1.3e-1             |
| Number of polar residues in positive patch <sup>§</sup> | 1.0e-1   | 2.6e-1  | 1.3e-1             |

\*exact p-values are given

<sup>§</sup>Described in details in Shazman, S. and Mandel-Gutfreund, Y. (2008) Classifying RNA-binding proteins based on electrostatic properties. *PLoS Comput Biol*, **4**, e1000146.

**Table S4:** Distinguishing DNA- from RNA-binding Zinc Finger domains

| <b>PDB code</b> | <b>Protein name</b>                          | <b>SCOP family</b>                    | <b>Nucleic-acid</b> | <b>Prediction</b> |
|-----------------|----------------------------------------------|---------------------------------------|---------------------|-------------------|
| 1ubdC           | Ying-Yang 1 protein<br>ZINC FINGER<br>DOMAIN | C2H2 and C2HC<br>zinc fingers         | DNA                 | RNA binding       |
| 1a1hA           | QGSR ZINC FINGER<br>PEPTIDE                  | C2H2 and C2HC<br>zinc fingers         | DNA                 | DNA binding       |
| 1zaaC           | ZIF268                                       | C2H2 and C2HC<br>zinc fingers         | DNA                 | RNA binding       |
| 1yujA           | GAGA FACTOR                                  | C2H2 and C2HC<br>zinc fingers         | DNA                 | DNA binding       |
| 2gliA           | PROTEIN (FIVE-<br>FINGER GLI)                | C2H2 and C2HC<br>zinc fingers         | DNA                 | DNA binding       |
| 1a1fA           | THREE-FINGER<br>ZIF268 PEPTIDE               | C2H2 and C2HC<br>zinc fingers         | DNA                 | DNA binding       |
| 1f4sP           | TRANSCRIPTIONAL<br>FACTOR ALCR               | Zn2/Cys6 DNA-<br>binding domain       | DNA                 | DNA binding       |
| 1rgoA           | Butyrate response<br>factor 2                | CCCH zinc finger                      | RNA                 | RNA binding       |
| 1a1tA           | NUCLEOCAPSID                                 | retrovirus zinc<br>finger like domain | RNA                 | DNA binding       |
| 1u6pA           | Gag polyprotein                              | retrovirus zinc<br>finger like domain | RNA                 | RNA binding       |
| 2hghA           | FINGERS 4,5 AND 6<br>OF TFIIIA               | C2H2 and C2HC<br>zinc fingers         | RNA                 | RNA binding       |
| 1tf3A           | FINGERS 1-3 OF<br>TFIIIA                     | C2H2 and C2HC<br>zinc fingers         | DNA                 | DNA binding       |
