# Supplementary material for: From face to interface recognition: a differential geometric approach to distinguish DNA from RNA binding surfaces
Source: PubMed Central journal article supplement — Nucleic Acids Res. 2011 Jun 21;39(17):7390–9. doi: 10.1093/nar/gkr395 (PMC3177183; doi:10.1093/nar/gkr395), 2011-06-21
Supplement: supp_gkr395_Supplementary_datafileS1.pdf [file supp_gkr395_Supplementary_datafileS1.pdf]

| id  | chain | protein name                               | SCOP fold                                                        | Unbound |
|-----|-------|--------------------------------------------|------------------------------------------------------------------|---------|
| D1  | 1a1fA | THREE-FINGER ZIF268 PEPTIDE                | C2H2 and C2HC zinc fingers,                                      |         |
| D2  | 1a1hA | QGSR ZINC FINGER PEPTIDE                   | C2H2 and C2HC zinc fingers                                       |         |
| D3  | 1a31A | TOPOISOMERASE I                            | DNA breaking-rejoining enzymes ,                                 |         |
| D4  | 1a66A | DNA BINDING DOMAIN OF NFATC1               | Common fold of diphtheria toxin/transcription factors/cytochrome |         |
| D5  | 1ahdP | Antennapedia homeodomain- Protein          | DNA/RNA-binding 3-helical bundle                                 |         |
| D6  | 1an2A | basic/helix-loop-helix/leucine zipper      | HLH-like                                                         |         |
| D7  | 1b69A | TN916 INTEGRASE N-TERMINAL DOMAIN          | DNA-binding domain                                               |         |
| D8  | 1bc8C | SAP-1 ETS DOMAIN                           | DNA/RNA-binding 3-helical bundle                                 |         |
| D9  | 1citA | ORPHAN NUCLEAR RECEPTOR NGFI-B             | Glucocorticoid receptor-like (DNA-binding domain)                |         |
| D10 | 1dmuA | BGLI RESTRICTION ENDONUCLEASE              | Restriction endonuclease-like                                    |         |
| D11 | 1e3oC | OCTAMER-BINDING TRANSCRIPTION FACTOR 1     | DNA/RNA-binding 3-helical bundle                                 |         |
| D12 | 1ecrA | replication-terminator protein             | and beta) Replication terminator protein (Tus)                   |         |
| D13 | 1ej9A | DNA TOPOISOMERASE I                        | DNA breaking-rejoining enzymes, Eukaryotic DNA topoisomerase I   |         |
| D14 | 1eriA | ECO RI ENDONUCLEASE                        | Restriction endonuclease-like                                    |         |
| D15 | 1exjA | TRANSCRIPTION ACTIVATOR BMRR               | Putative DNA-binding domain                                      |         |
| D16 | 1f4sP | TRANSCRIPTIONAL FACTOR ALCR                | Zn2/Cys6 DNA-binding domain                                      |         |
| D17 | 1fokA | FOKI RESTRICTION ENDONUCLEAS               | DNA/RNA-binding 3-helical bundle, Restriction endonuclease-like  |         |
| D18 | 1g4dA | MU BACTERIOPHAGE REPRESSOR                 | Putative DNA-binding domain                                      | 1qpmA   |
| D19 | 1gccA | ETHYLENE RESPONSIVE ELEMENT BINDING FACTOR | DNA-binding domain                                               |         |
| D20 | 1hlvA | MAJOR CENTROMERE AUTOANTIGEN B             | DNA/RNA-binding 3-helical bundle                                 | 1bw6A   |
| D21 | 1i3jA | INTRON-ASSOCIATED ENDONUCLEASE 1           | DNA-binding domain of intron-encoded endonucleases               |         |
| D22 | 1iv6A | TELOMERIC REPEAT BINDING FACTOR 1 - TRF1   | DNA/RNA-binding 3-helical bundle                                 |         |

|     |       |                                                            |                                                                                  |       |
|-----|-------|------------------------------------------------------------|----------------------------------------------------------------------------------|-------|
| D23 | 1j1vA | DnaA domainIV-<br>Chromosomal replication                  | DNA/RNA-binding 3-helical bundle                                                 |       |
| D24 | 1j46A | HMG-BOX DOMAIN-SEX-<br>DETERMINING REGION Y                | HMG-box                                                                          |       |
| D25 | 1jkoC | DNA-INVERTASE HIN                                          | DNA/RNA-binding 3-helical bundle                                                 |       |
| D26 | 1l1zA | MutM is a bacterial 8-<br>oxoguanine glycosylase           | S13-like H2TH domain                                                             | 1lm1A |
| D27 | 1lcdA | LAC REPRESSOR HEADPIECE                                    | lambda repressor-like DNA-binding<br>domains                                     |       |
| D28 | 1lfuP | homeobox protein PBX1-<br>homeodomain AND                  | DNA/RNA-binding 3-helical bundle                                                 |       |
| D29 | 1lo1A | Steroid hormone receptor<br>ERR2-                          | Glucocorticoid receptor-like (DNA-binding<br>domain)                             |       |
| D30 | 1lwyA | 8-OXOGUANINE DNA<br>GLYCOSYLASE-CORE                       | DNA-glycosylase,TBP-like                                                         |       |
| D31 | 1mnnA | NDT80 protein-sporulation<br>specific transcription factor | Common fold of diphtheria<br>toxin/transcription factors/cytochrome              |       |
| D32 | 1mseC | C-Myb DNA-Binding<br>Domain                                | DNA/RNA-binding 3-helical bundle                                                 |       |
| D33 | 1n39A | human 8-oxoguanine<br>glycosylase-hOgg1                    | DNA-glycosylase                                                                  |       |
| D34 | 1n3aA | N-glycosylase/DNA lyase                                    | DNA-glycosylase, TBP-like                                                        | 1ko9A |
| D35 | 1n4IA | Reverse Transcriptase-part<br>of Pol polyprotein           | DNA/RNA polymerases                                                              |       |
| D36 | 1nkcA | DNA POLYMERASE I-                                          | Ribonuclease H-like motif, DNA/RNA<br>polymerases                                |       |
| D37 | 1octC | OCT-1 POU DOMAIN                                           | DNA/RNA-binding 3-helical bundle                                                 |       |
| D38 | 1odhA | ZN-CONTAINING DNA-<br>BINDING DOMAIN                       | GCM domain                                                                       |       |
| D39 | 1pdnC | PRD PAIRED                                                 | DNA/RNA-binding 3-helical bundle                                                 |       |
| D40 | 1pnrA | PROTEIN (PURINE<br>REPRESSOR)                              | lambda repressor-like DNA-binding<br>domains, Periplasmic binding protein-like I |       |
| D41 | 1pp7U | initiator binding protein                                  | DNA/RNA-binding 3-helical bundle                                                 |       |
| D42 | 1qpiA | TETRACYCLINE REPRESSOR                                     | DNA/RNA-binding 3-helical bundle,<br>Tetracyclin repressor-like, C-terminal      |       |
| D43 | 1qtmA | DNA POLYMERASE I-<br>KLENOW FRAGMENT                       | Ribonuclease H-like motif, DNA/RNA<br>polymerases                                |       |
| D44 | 1r8eA | BmrR-multidrug-efflux<br>transporter regulator             | Putative DNA-binding domain                                                      |       |
| D45 | 1repC | REPLICATION INITIATION<br>PROTEIN                          | DNA/RNA-binding 3-helical bundle                                                 |       |

|     |       |                                                    |                                                                            |       |
|-----|-------|----------------------------------------------------|----------------------------------------------------------------------------|-------|
| D46 | 1rr8C | DNA topoisomerase I                                | DNA breaking-rejoining enzymes,                                            |       |
| D47 | 1rrjA | DNA topoisomerase I                                | Long alpha-hairpin                                                         |       |
| D48 | 1ryrA | DNA polymerase IV                                  | Lesion bypass DNA polymerase (Y-family),                                   |       |
| D49 | 1sknP | DNA-BINDING DOMAIN OF SKN-1                        | A DNA-binding domain in eukaryotic transcription factors                   |       |
| D50 | 1t38A | Methylated-DNA--protein-cysteine methyltransferase | DNA/RNA-binding 3-helical bundle ,<br>Ribonuclease H-like motif            | 1eh6A |
| D51 | 1tc3C | SPECIFIC DNA BINDING DOMAIN                        | DNA/RNA-binding 3-helical bundle                                           |       |
| D52 | 1tf3A | FINGERS 1-3 OF TFIIIA,                             | C2H2 and C2HC zinc fingers                                                 |       |
| D53 | 1tghA | PROTEIN (TATA BINDING PROTEIN (TBP))               | TBP-like, TATA-box binding protein-like                                    |       |
| D54 | 1ttuA | lin-12 And Glp-1 transcriptional regulator         | Immunoglobulin-like beta-sandwich,                                         |       |
| D55 | 1u78A | transposable element tc3 transposase               | DNA/RNA-binding 3-helical bundle                                           |       |
| D56 | 1ubdC | PROTEIN (YY1 ZINC FINGER DOMAIN)                   | C2H2 and C2HC zinc fingers                                                 |       |
| D57 | 1vasA | T4 ENDONUCLEASE V                                  | T4 endonuclease V                                                          |       |
| D58 | 1vfcA | Telomeric repeat binding factor 2                  | DNA/RNA-binding 3-helical bundle                                           |       |
| D59 | 1wd1A | hyperthermophilic chromosomal protein              | SH3-like barrel                                                            |       |
| D60 | 1wetA | PURINE REPRESSOR                                   | lambda repressor-like DNA-binding domainsl                                 |       |
| D61 | 1xc8A | Formamidopyrimidine-DNA glycosylase                | S13-like H2TH domain, N-terminal domain of MutM-like DNA repair proteins , |       |
| D62 | 1xpxA | HOMEO-PROSPERO DOMAIN                              | DNA/RNA-binding 3-helical bundle                                           |       |
| D63 | 1yo5C | PDEF-SAM pointed domain                            | DNA/RNA-binding 3-helical bundle                                           |       |
| D64 | 1yujA | GAGA FACTOR                                        | C2H2 and C2HC zinc fingers                                                 |       |
| D65 | 1yz8P | Pituitary homeobox 2                               | DNA/RNA-binding 3-helical bundle                                           |       |
| D66 | 1zaaC | ZIF268                                             | C2H2 and C2HC zinc fingers                                                 |       |
| D67 | 1zq3P | Homeotic bicoid protein                            | DNA/RNA-binding 3-helical bundle                                           |       |
| D68 | 2bopA | bovine papillomavirus-1 E2                         | Ferredoxin-like                                                            |       |

|     |       |                                                         |                                                      |       |
|-----|-------|---------------------------------------------------------|------------------------------------------------------|-------|
| D69 | 2c7pA | HHAI DNA METHYLTRANSFERASE                              | S-adenosyl-L-methionine-dependent methyltransferases |       |
| D70 | 2dgcA | GCN4- bZIP                                              | Parallel coiled-coil                                 |       |
| D71 | 2etwA | Ndt80 DNA-binding Domain                                | Common fold of diphtheria                            |       |
| D72 | 2ewjA | DNA replication terminus site-binding protein-ERYTHROID | Replication terminator protein (Tus)                 |       |
| D73 | 2gatA | TRANSCRIPTION FACTOR                                    | Glucocorticoid receptor-like (DNA-binding domain)    |       |
| D74 | 2gliA | PROTEIN (FIVE-FINGER GLI)                               | C2H2 and C2HC zinc fingers                           |       |
| D75 | 2gzkA | Sex-determining region on Y / HMGB1                     | HMG-box                                              |       |
| D76 | 2hdcA | TRANSCRIPTION FACTOR                                    | DNA/RNA-binding 3-helical bundle                     |       |
| D77 | 2lefA | transcription factor LEF-1                              | HMG-box                                              |       |
| D78 | 2nohA | N-glycosylase/DNA lyase                                 | DNA-glycosylase, TBP-like                            |       |
| D79 | 2pucA | PROTEIN (PURINE REPRESSOR)                              | lambda repressor-like DNA-binding domainsI           |       |
| D80 | 3htsB | HEAT SHOCK TRANSCRIPTION FACTOR                         | DNA/RNA-binding 3-helical bundle                     |       |
| D81 | 4sknE | Hydrolase-PROTEIN (URACIL-DNA                           | Uracil-DNA glycosylase-like                          |       |
| D82 | 5gatA | NITROGEN REGULATORY PROTEIN AREA                        | Glucocorticoid receptor-like (DNA-binding domain)    |       |
| D83 | 5mhtA | PROTEIN (HHAI METHYLTRANSFERASE)                        | S-adenosyl-L-methionine-dependent methyltransferases |       |
| D84 | 6croA | LAMBDA CRO REPRESSOR                                    | lambda repressor-like DNA-binding domains            |       |
| D85 | 6paxA | HOMEBOX PROTEIN PAX-6                                   | DNA/RNA-binding 3-helical bundle                     |       |
| D86 | 7mhtA | CYTOSINE-SPECIFIC METHYLTRANSFERASE                     | S-adenosyl-L-methionine-dependent methyltransferases |       |
| D87 | 8mhtA | CYTOSINE-SPECIFIC METHYLTRANSFERASE                     | S-adenosyl-L-methionine-dependent methyltransferases |       |
| R1  | 1a1t  | NUCLEOCAPSID                                            | retrovirus zinc finger like domain                   | 1mfsA |
| R2  | 1aud  | human U1A                                               | canonical RBD                                        | 1fhtA |
| R3  | 1b23  | ELONGATION FACTOR TU                                    | Elongation factors                                   | 1tuiA |
| R4  | 1c0a  | ASPARTYL TRNA SYNTHETASE                                | Anticodon-binding domain                             | 1eqrA |

|     |      |                                             |                                                                               |       |
|-----|------|---------------------------------------------|-------------------------------------------------------------------------------|-------|
| R5  | 1cx0 | U1A PROTEIN                                 | Canonical RBD                                                                 |       |
| R6  | 1d6k | RIBOSOMAL PROTEIN L25                       | Ribosomal protein L25-like                                                    | 1b75A |
| R7  | 1dk1 | 30S RIBOSOMAL PROTEIN S15                   | Ribosomal protein S15                                                         |       |
| R8  | 1drz | U1 SMALL RIBONUCLEOPROTEIN A                | Canonical RBD                                                                 | 1nu4A |
| R9  | 1dul | SIGNAL RECOGNITION PARTICLE PROTEIN         | Signal peptide-binding domain                                                 |       |
| R10 | 1euy | GLUTAMINYL-TRNA SYNTHETASE                  | Class I aminoacyl-tRNA synthetases (RS), catalytic domain                     |       |
| R11 | 1f7u | ARGINYL-TRNA SYNTHETASE                     | Anticodon-binding domain of a subclass of class I aminoacyl- tRNA synthetases | 1bs2A |
| R12 | 1f7y | 30S RIBOSOMAL PROTEIN S15                   | Ribosomal protein S15                                                         |       |
| R13 | 1fje | NUCLEOLIN RBD12- TWO N-TERMINAL RBD DOMAINS | Canonical RBD                                                                 |       |
| R14 | 1gsg | GLUTAMINYL-TRNA SYNTHETASE                  | Class I aminoacyl-tRNA synthetases (RS), catalytic domain                     |       |
| R15 | 1gtr | GLUTAMINYL-tRNA SYNTHETASE                  | Class I aminoacyl-tRNA synthetases (RS), catalytic domain                     | 1nylA |
| R16 | 1h3e | TYROSYL-TRNA SYNTHETASE                     | Class I aminoacyl-tRNA synthetases                                            | 1h3fA |
| R17 | 1hq1 | SIGNAL RECOGNITION PARTICLE PROTEIN         | Signal peptide-binding domain                                                 |       |
| R18 | 1jjd | SIGNAL RECOGNITION PARTICLE 19 KDA PROTEIN  | SRP19                                                                         |       |
| R19 | 1k1g | SF1-Bo isoform                              | Eukaryotic type KH-domain                                                     |       |
| R20 | 1k8w | tRNA Pseudouridine Synthase B               | PUA domain, synthase Pseudouridine II TruB                                    |       |
| R21 | 1kuq | 30S RIBOSOMAL PROTEIN S15                   | Ribosomal protein S15                                                         | 2fkxA |
| R22 | 1lng | Signal recognition particle 19 kDa protein  | SRP19                                                                         |       |
| R23 | 1mzp | 50s ribosomal protein L1P                   | Ribosomal protein L1                                                          |       |
| R24 | 1o0b | Glutaminyl-tRNA synthetase                  | Gln-tRNA synthetase (GlnRS), C-terminal (anticodon- binding) domain           |       |
| R25 | 1ob2 | ELONGATION FACTOR TU                        | Elongation factors, EF-Tu/eEF-1alpha/eIF2-gamma C-terminal domain             | 1efcA |
| R26 | 1qf6 | THREONYL-TRNA SYNTHETASE                    | Anticodon-binding domain of Class II aaRS,                                    |       |
| R27 | 1qtq | GLUTAMINYL-TRNA SYNTHETASE                  | Gln-tRNA synthetase , Class I aminoacyl-tRNA synthetases                      |       |

|     |       |                                                 |                                                                               |       |
|-----|-------|-------------------------------------------------|-------------------------------------------------------------------------------|-------|
| R28 | 1rgo  | Butyrate response factor 2 - Tandem Zinc Finger | CCCH zinc finger                                                              |       |
| R29 | 1sj3  | small nuclear ribonucleoprotein A               | Canonical RBD                                                                 |       |
| R30 | 1t4l  | Ribonuclease III                                | Double-stranded RNA-binding domain (dsRBD)                                    |       |
| R31 | 1u0b  | CysteinyI-tRNA synthetase                       | Anticodon-binding domain of a subclass of class I aminoacyl- tRNA synthetases | 1li5A |
| R32 | 1u6p  | Gag polyprotein                                 | Retrovirus zinc finger-like domains                                           |       |
| R33 | 1zjw  | Glutaminyl-tRNA synthetase                      | Gln-tRNA synthetase, Class I aminoacyl-tRNA synthetases                       |       |
| R34 | 1zl3  | tRNA pseudouridine synthase B                   | PUA domain, Pseudouridine synthase II TruB                                    | 1r3fA |
| R35 | 2ab4  | tRNA pseudouridine synthase B                   | PUA domain-like, Pseudouridine synthase                                       | 1ze1A |
| R36 | 2asb  | Transcription elongation protein nusA           | Cold shock DNA-binding domain-like,                                           |       |
| R37 | 2dr2  | Tryptophanyl-tRNA synthetase -                  | Class I aminoacyl-tRNA synthetases (RS), catalytic domain                     | 1ulhA |
| R38 | 2dr8  | CCA-adding enzyme                               | Archaeal tRNA CCA-adding enzyme,                                              | 1r89A |
| R39 | 2drb  | CCA-adding enzyme                               | Archaeal tRNA CCA-adding enzyme                                               | 1r8cA |
| R40 | 2fk6  | RIBONUCLEASE Z                                  | RNase Z-like                                                                  | 1y44A |
| R41 | 2hgh  | Transcription factor IIIA-zinc fingers 4-6      | Classic zinc finger, C2H2                                                     |       |
| R42 | 2oih  | U1 small nuclear ribonucleoprotein A            | Canonical RBD                                                                 | 1nu4A |
| R43 | 484d  | BASIC REV PEPTIDE                               | HIV-1 REV fragments                                                           |       |
|     | 3bx2A | PUF protein                                     | Pumilio-homology domain                                                       | 3bwtA |
|     | 1ibmS | 30S Ribosomal protein S19                       | Ribosome and ribosomal fragments                                              | 1qkfA |
|     | 1q2rA | ribosyltransferase                              | TIM beta/alpha-barrel                                                         | 1r5yA |
|     | 1e7kA | NHP2-like protein 1                             | NAD(P)-binding Rossmann-fold domains                                          | 2jnbA |
|     | 1m8yB | Pumilo homology domain                          | alpha-alpha superhelix                                                        | 1m8zA |
|     | 2a8vA | Rho transcription terminatic                    | Ferritin-like                                                                 | 1a62A |

|       |                       |                                                      |       |
|-------|-----------------------|------------------------------------------------------|-------|
| 1av6A | VP39 protein          | S-adenosyl-L-methionine-dependent methyltransferases | 3magA |
| 1hc8A | Ribosomal protein L11 | DNA/RNA-binding 3-helical bundle                     | 2fowA |
