# Supplementary material for: From face to interface recognition: a differential geometric approach to distinguish DNA from RNA binding surfaces
Source: PubMed Central journal article supplement — Nucleic Acids Res. 2011 Jun 21;39(17):7390–9. doi: 10.1093/nar/gkr395 (PMC3177183; doi:10.1093/nar/gkr395), 2011-06-21
Supplement: supp_gkr395_Supplementary_datafileS2.pdf [file supp_gkr395_Supplementary_datafileS2.pdf]

| <b>PDB code</b> | <b>Protein name</b>                                                 | <b>Nucleic-Acid</b> |
|-----------------|---------------------------------------------------------------------|---------------------|
| 1A1F            | Zif268-DNA complexe                                                 | DNA                 |
| 1A1G            | Zif268-DNA complexe                                                 | DNA                 |
| 1A1H            | Zif268-DNA complexe                                                 | DNA                 |
| 1A1I            | Zif268-DNA complexe                                                 | DNA                 |
| 1A1J            | Zif268-DNA complexe                                                 | DNA                 |
| 1A1K            | Zif268-DNA complexe                                                 | DNA                 |
| 1A1L            | Zif268-DNA complexe                                                 | DNA                 |
| 1A6B            | zinc finger protein NCp10                                           | DNA                 |
| 1AAY            | Zif268 protein-DNA complex                                          | DNA                 |
| 1BJ6            | Retrovirus zinc finger-like domains                                 | DNA                 |
| 1F2I            | Zinc Finger Dimer                                                   | DNA                 |
| 1G2D            | C2H2 zinc finger/tata box bound to DNA                              | DNA                 |
| 1HVN            | Zinc- and sequence-dependent binding to nucleic acids               | DNA                 |
| 1HVO            | Zinc- and sequence-dependent binding to nucleic acids               | DNA                 |
| 1I3J            | Zinc- and sequence-dependent binding to nucleic acids               | DNA                 |
| 1JK2            | a Zif268 mutant highlights the complexities of zinc finger-DNA      | DNA                 |
| 1LLM            | a designed dimeric zinc finger protein bound to DNA                 | DNA                 |
| 1MEY            | a designed zinc finger protein bound to DNA                         | DNA                 |
| 1P47            | tandem Zif268-DNA complexes                                         | DNA                 |
| 1PYI            | DNA recognition by proteins containing a Zn2Cys6 binuclear cluster. | DNA                 |
| 1TF3            | TFIIIA zinc-finger bound to DNA                                     | DNA                 |
| 1TF6            | a six-finger transcription factor IIIA complex.                     | DNA                 |
| 1UBD            | zinc finger domain bound to adeno virus                             | DNA                 |
| 1ZAA            | A Zif268-DNA complex                                                | DNA                 |
| 2DRP            | A two zinc-finger peptide                                           | DNA                 |
| 2EXF            | nucleocapsid protein (NCp7)                                         | DNA                 |
| 2GLI            | a five-finger GLI-DNA complex                                       | DNA                 |
| 2I13            | designedr zinc finger bound to DNA.                                 | DNA                 |
| 2JP9            | The Wilms tumor suppressor protein zinc finger                      | DNA                 |
| 2JPA            | The Wilms tumor suppressor protein zinc finger                      | DNA                 |
| 2JX1            | The fifth zinc finger of Myelin Transcription Factor 1              | DNA                 |
| 2KAE            | DNA recognition by GATA-type zinc finger domains.                   | DNA                 |
| 2KKF            | MLL CXXC domain-DNA complex                                         | DNA                 |
| 2KMK            | Solution structure of Gfi-1 zinc domain bound to consensus DNA      | DNA                 |
| 2PRT            | Wilms Tumor Suppressor Protein Zinc Finger Domain .                 | DNA                 |
| 2WBS            | THE ZINC FINGER DOMAIN OF KLF4 .                                    | DNA                 |
| 2WBU            | KRUEPPEL-LIKE FACTOR 4                                              | DNA                 |
| 3CBB            | Zinc finger, C4 type (two domains)                                  | DNA                 |
| 3DFV            | multiple GATA zinc fingers bound to DNA                             | DNA                 |
| 3DFX            | multiple GATA zinc fingers bound to DNA                             | DNA                 |
| 3DZU            | Zinc finger, C4 type (two domains)                                  | DNA                 |
| 3DZY            | Zinc finger, C4 type (two domains)                                  | DNA                 |
| 3FYL            | Glucocorticoid receptor                                             | DNA                 |
| 3G6P            | Zinc finger, C4 type (two domains)                                  | DNA                 |
| 3G6Q            | Zinc finger, C4 type (two domains)                                  | DNA                 |
| 3G6R            | Zinc finger, C4 type (two domains)                                  | DNA                 |

|      |                                                                        |     |
|------|------------------------------------------------------------------------|-----|
| 3G6T | Zinc finger, C4 type (two domains)                                     | DNA |
| 3G6U | Zinc finger, C4 type (two domains)                                     | DNA |
| 3G8U | Zinc finger, C4 type (two domains)                                     | DNA |
| 3G8X | Zinc finger, C4 type (two domains)                                     | DNA |
| 3G97 | Zinc finger, C4 type (two domains)                                     | DNA |
| 3G99 | Zinc finger, C4 type (two domains)                                     | DNA |
| 3G9I | Zinc finger, C4 type (two domains)                                     | DNA |
| 3G9J | Zinc finger, C4 type (two domains)                                     | DNA |
| 3G9M | Zinc finger, C4 type (two domains)                                     | DNA |
| 3G9O | Zinc finger, C4 type (two domains)                                     | DNA |
| 3G9P | Zinc finger, C4 type (two domains)                                     | DNA |
| 3G08 | Zinc finger found in FPG and IleRS                                     | DNA |
| 3GP1 | Zinc finger found in FPG and IleRS                                     | DNA |
| 3GPP | Zinc finger found in FPG and IleRS                                     | DNA |
| 3GPU | Zinc finger found in FPG and IleRS                                     | DNA |
| 3GPX | Zinc finger found in FPG and IleRS                                     | DNA |
| 3GPY | Zinc finger found in FPG and IleRS                                     | DNA |
| 3GQ3 | Zinc finger found in FPG and IleRS                                     | DNA |
| 3GQ4 | Zinc finger found in FPG and IleRS                                     | DNA |
| 3GQ5 | Zinc finger found in FPG and IleRS                                     | DNA |
| 3H15 | Primase zinc finger                                                    | DNA |
| 3JR4 | Zinc finger found in FPG and IleRS                                     | DNA |
| 3JR5 | Zinc finger found in FPG and IleRS                                     | DNA |
| 3M9E | Zinc finger, C4 type (two domains)                                     | DNA |
| 3OD8 | Poly(ADP-ribose) polymerase and DNA-Ligase                             | DNA |
| 3ODA | Poly(ADP-ribose) polymerase and DNA-Ligase                             | DNA |
| 3ODC | Poly(ADP-ribose) polymerase and DNA-Ligase                             | DNA |
| 3ODE | polymerase and DNA-Ligase Zn-finger region                             | DNA |
| 3PTA | DNMT1 in complex with DNA- CXXC zinc finger domain <a href="#">PDB</a> | DNA |
| 3QMB | CFP1 CXXC domain.                                                      | DNA |
| 3QMC | CFP1 CXXC domain.                                                      | DNA |
| 3QMD | CFP1 CXXC domain.                                                      | DNA |
| 3QMG | CFP1 CXXC domain.                                                      | DNA |
| 3QMH | CFP1 CXXC domain.                                                      | DNA |
| 3QMI | CFP1 CXXC domain.                                                      | DNA |
| 1a1t | retrovirus zinc finger like domain                                     | RNA |
| 1RGO | Class II AU-Rich Element by the Tandem Zinc Finger Domain              | RNA |
| 1U6P | Nucleocapsid protein                                                   | RNA |
| 1UN6 | Transcription factor IIIA-fingers 4-6                                  | RNA |
| 2HGH | Transcription factor IIIA-fingers 4-6                                  | RNA |
| 3CW1 | human spliceosomal U1 snRNP                                            | RNA |
| 3D2S | MBNL1 tandem zinc finger 3 and 4 domain                                | RNA |
| 3G9Y | the second zinc finger ZRANB2/ZNF265 boundAGGUAA <a href="#">PDB</a>   | RNA |
